# Supplementary material for: Occurrence and Survival of Livestock-Associated MRSA in Pig Manure and on Agriculture Fields
Source: MDPI journal article supplement (doi:10.3390/antibiotics10040448), 2021-04-16
Supplement: s1 [file s1]

# Occurrence and Survival of Livestock-Associated MRSA in Pig Manure and on Agriculture Fields

Lærke Boye Astrup <sup>1</sup>, Julie Elvekjær Hansen <sup>1</sup> and Karl Pedersen <sup>2,\*</sup>

**Table S1.** Overview of sample types at different temperatures analyzed in the *in vitro* survival studies.

| Sample types            | 5°C                                 | 15°C                                | 25°C                                | 37°C                                |
|-------------------------|-------------------------------------|-------------------------------------|-------------------------------------|-------------------------------------|
| Natural positive manure | A, B                                | C                                   | -                                   | A, B                                |
| Natural negative manure | D                                   | D                                   | D                                   | D                                   |
| Spiked manure           | D1 <sup>+</sup> , D2 <sup>+</sup>   |
|                         | D1 <sup>++</sup> , D2 <sup>++</sup> |

Three different natural positive samples = A, B and C from the same farm at different samplings.

Natural negative manure = D.

Natural negative manure spiked with ~ 10<sup>3</sup> CFU/mL MRSA t011 = D1<sup>+</sup> and MRSA t034 = D2<sup>+</sup>.

Natural negative manure spiked with ~ 10<sup>7</sup> CFU/mL MRSA t011 = D1<sup>++</sup> and MRSA t034 = D2<sup>++</sup>.
